# Supplementary material for: Exploration of the Esophageal Mucosal Barrier in Non-Erosive Reflux Disease
Source: MDPI journal article supplement (doi:10.3390/ijms18051091), 2017-05-19
Supplement: s1 [file s1]

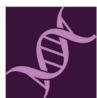

## **SUPPLEMENTARY MATERIAL**

### **S1 Ussing Chamber protocol**

Esophageal biopsies were mounted in Ussing Chambers with a 9-mm opening, that was reduced to fit biopsy specimens to an area of 1.76 mm<sup>2</sup> using a technique previously described [47]. Both compartments were filled with 1.5 ml 10 mmol/l glucose KRB solution. The chambers were kept at 37 °C and continuously oxygenated and circulated by gas flow (95% O<sub>2</sub>/5% CO<sub>2</sub>) during the whole experiment. A four-electrode system was used, as described previously [48]. Ag/Cl electrodes with 3M NaCl / 2% agar bridges were used for measurement of transepithelial potential difference (PD) and current (I) monitoring. Every minute, direct pulses of 1.5, -1.5, 3.-3 and 0 µA, with duration of 235 ms were calculated. Every minute the TEER was obtained according to Ohm's law from the slope of the I-U line.

### **S2 TRPV1 and tight junction gene transcription**

Gene transcription of 18S was used as reference. Total RNA was isolated from snap-frozen biopsies using Trizol (Invitrogen, Carlsbad, CA, USA), followed by a cleaning step with the RNeasy Mini kit (Qiagen, Austin, TX, USA). Quantification of the purified RNA was carried out using the NanoDrop spectrophotometer (Nano- Drop Technologies, Wilmington, DE, USA). C-DNA was synthesized using the iScript cDNA Syntheses Kit (Bio-Rad, Hercules, CA, USA). PCR amplifications were run on the MyIQ real-time PCR detection system (Bio-Rad, Hercules, CA, USA). PCRs were performed with 5 µL of

cDNA template diluted to a concentration of 4 ng/mL, 12.5  $\mu$ L iQ Sybr Green supermix (Bio-Rad), 1  $\mu$ L forward and reversed primers (10  $\mu$ mol/L) and 5.5  $\mu$ L of sterile water.

Cycling conditions were as follows: 3 min at 95 °C for denaturation of cDNA followed by 40 amplification cycles of 10 s at 95 °C and annealing for 45 s at 60 °C.

The following primers were used:

| Name              | Forward / Reverse<br>Primer Name | Sequence                            |
|-------------------|----------------------------------|-------------------------------------|
| <b>18SRNA</b>     | 18SrRNA1F                        | 5'-GTAACCCGTTGAACCCATT-3'           |
|                   | 18SrRNA1R                        | 5'-CCATCCAATCGGTAGTAGCG-3'          |
| <b>ZO-1</b>       | ZO-1 F                           | 5'-AGGGGCAGTGGTGGTTTTCTGTTCTTTC-3'  |
|                   | ZO-1 R                           | 5'-GCAGAGGTCAAAGTTCAAGGCTCAAGAGG-3' |
| <b>OCLN</b>       | OCLNf1                           | 5'-TCAGGGAATATCCACCTATCACTTCAG-3'   |
|                   | OCLNr1                           | 5'-CATCAGCAGCAGCCATGTACTCTTCAC-3'   |
| <b>CLDN-4</b>     | CLDN4f1                          | 5'-ACAGACAAGCCTTACTCC-3'            |
|                   | CLDN4r1                          | 5'-GGAAGAACAAGCAGAG-3'              |
| <b>CLDN-1</b>     | CLDN1_f                          | 5'-GGGCTGCAGCTGTTGGGCTT -3'         |
|                   | CLDN1_r                          | 5' GGGTTGCTTGCAATGTGCTGCT-3'        |
| <b>E-cadherin</b> | E-cadh_f                         | 5'-CACCTGGAGAGAGGCCGCGT-3'          |
|                   | E-cadh_r                         | 5'-AACGGAGGCCTGATGGGGCG-3'          |
| <b>TRPV-1</b>     | TRPVf1                           | TCTCACCTACATCCTCTGCTCAA             |
|                   | TRPVr1                           | TTGCTCTCCTGTGCGATCTTGT              |
